# Supplementary material for: Current state and practice variation in the use of Meningitis/Encephalitis (ME) FilmArray panel in children
Source: Springer Nature journal article supplement (doi:10.1186/s12879-022-07789-2), 2022-10-31
Supplement: MOESM1 [file 23658730]

# BioFire Testing Pattern Survey

Please complete the survey below.

Thank you!

---

1.  Name of hospital \_\_\_\_\_

---

2. Characteristics of hospital

(Community hospital= non-teaching hospitals that are not federally funded Combined academic + community = community hospitals with affiliations with universities, colleges, med schools Academic Pediatric hospital within hospital = Children's hospital as a part of bigger system Freestanding children's hospital = geographically, financially, clinically and administratively independent )

- Community hospital-University affiliated
  - Community hospital - Not university hospital
  - Children's hospital - University affiliated
  - Children's hospital - Not university affiliated
  - Others
- 

3. Location

(Northeast : CT, ME, MA, NH, RI, NJ, NY, PA, VT Midwest: IL, IN, MI, OH, WI, IA, KS, MN, MO, NE, ND, SD South: DE, FL, GA, MD, NC, SC, VA, DC, WA, KY, AL, MS, TN, AR, LA, OK, TX West : AZ, CO, ID, MT, NV, NM, UT, WY, AK, CA, HI, OR, WA )

- US-NE
  - US-Midwest
  - US-south
  - US-West coast
  - Outside US
- 

4. Your current position

- Physician (MD/DO)
  - Advance practice providers
- 

5. Your specialty of practice

- Hospitalist
  - Emergency Medicine
  - Pediatric Intensive Care Unit
  - Infectious Disease
  - Neonatal Intensive Care Unit
  - Others
- 

6. How long have you been practicing in this specialty

- In-training
- 1-2 years
- 3-5 years
- 6-10 years
- 10+ years

---

7. How long have you been using CSF BioFire (CSF meningitis/encephalitis Filmarray) at your institution?

- Not using
- 1 or less
- 2-3 years
- 4 + years

---

8. Did the CSF BioFire test replace single organism PCR test such as enterovirus or Herpes Simplex Virus (HSV) PCR?

- Yes, we no longer use single-organism PCR
- No , We still use single-organism PCR in some scenarios
- No, we still use single organism PCR in all scenarios

---

9. Is CSF BioFire test sent out to an external lab?

- Yes
- No
- I don't know

---

10. What is the average time to result?

- < 3 hours
- 3-6 hours
- 6- 24 hours
- >24 hours

---

11. Are you aware of any institutional guidelines regarding the use (ordering) of CSF BioFire testing?

- Yes
- No

---

12. Does your institution provide guidelines for interpreting CSF BioFire results?

- Yes
- No

---

13. Are you aware of the performance characteristics (sensitivity/specificity/positive predictive value/negative predictive value) of the CSF BioFire test?

- Yes
- No
- Depends on organism

---

14. On a scale of 1 to 5, with 5 being VERY confident, how confident are you in interpreting the results of the CSF BioFire test?

- 5 -Very Confident
- 4-Confident
- 3-Somewhat confident
- 2-Not confident
- 1-Unable to interpret

---

15. On a 3 week old febrile infant whose clinical picture is not consistent with bacterial meningitis would you stop antimicrobials based on positive viral (ex: enterovirus) BioFire results alone ?

- Yes
- No

---

Would you stop antibiotics based on a negative bacterial BioFire result and normal CSF cell counts without waiting for culture?

- Yes  
 No

---

16. An otherwise healthy 4 yr. old patient presents with fevers and headache. His clinical features are not suspicious of bacterial meningitis/encephalitis, however, an LP is done and the CSF bacterial BioFire results are positive. Would you start antimicrobials based on positive CSF bacterial BioFire results alone?

- Yes  
 No

---

17. In the same patient (as question no 16) would you start antimicrobials based on positive CSF bacterial BioFire results in addition to CSF cell count suggestive of meningitis?

- Yes  
 No

---

17. In the same patient (as question no 16) would you narrow the antibiotics given the positive bacterial BioFire test without waiting for culture?

- Yes  
 No

---

18. Would you like to enter a raffle for a chance to win a \$25 gift card?

- Yes  
 No

---

Please enter your email address

---
